# Supplementary material for: Lifetimes and decay mechanisms of isotopically substituted ozone above the dissociation threshold: matching quantum and classical dynamics
Source: Royal Society of Chemistry journal article supplement (doi:10.1039/d3cp04286c), 2023-12-19
Supplement: d3cp04286c1.pdf [file d3cp04286c1.pdf]

Supplementary data

Lifetimes and decay mechanisms of isotopically substituted  
ozone above the dissociation threshold: Matching quantum and  
classical dynamics

DOI: [10.1039/D3CP04286C](https://doi.org/10.1039/D3CP04286C) (Paper) *Phys. Chem. Chem. Phys.*

Viatcheslav Kokoouline , Alexander Alijah and Vladimir G. Tyuterev

Below are given energies of bound vibrational states of the  $^{16}\text{O}^{16}\text{O}^{18}\text{O}$  isotopologue of ozone as well as energies and widths of resonant vibrational states of the molecule. The states of A and B symmetries are separated (the B states are in the lower part of the table). The energies and widths are given in units of  $\text{cm}^{-1}$ . The origin of energies is at the ground vibrational level of the molecule.

**Bound A states**

| <i>Energy</i> | <i>Energy</i> | <i>Energy</i> | <i>Energy</i> |
|---------------|---------------|---------------|---------------|
| 0.00000       | 5202.96592    | 6791.80362    | 7851.32522    |
| 14.22262      | 5233.13850    | 6799.51764    | 7856.77965    |
| 693.14433     | 5254.56987    | 6810.68940    | 7856.89985    |
| 698.55938     | 5256.15990    | 6813.10630    | 7867.77492    |
| 1041.85187    | 5271.94702    | 6854.91690    | 7869.27879    |
| 1074.18671    | 5273.67929    | 6855.13114    | 7888.32461    |
| 1104.57567    | 5289.85663    | 6857.28144    | 7892.58977    |
| 1380.40062    | 5298.42343    | 6860.72007    | 7904.76005    |
| 1383.78053    | 5353.96155    | 6877.42308    | 7906.78590    |
| 1710.31813    | 5354.82705    | 6896.59533    | 7910.10546    |
| 1759.86608    | 5380.53059    | 6904.38756    | 7928.05931    |
| 1781.22720    | 5398.87949    | 6923.19254    | 7946.18223    |
| 1992.06515    | 5416.39388    | 6925.51502    | 7949.33569    |
| 2042.11318    | 5443.28795    | 6929.18570    | 7956.91046    |
| 2059.72714    | 5472.72278    | 6937.45578    | 7958.18161    |
| 2071.88420    | 5482.63195    | 6948.32673    | 7974.83379    |
| 2104.26759    | 5494.77709    | 6974.43231    | 7980.00100    |
| 2143.01832    | 5495.64523    | 6985.85483    | 7984.74870    |
| 2186.62029    | 5527.18157    | 6986.39518    | 7988.07056    |
| 2375.79623    | 5540.13714    | 7003.90843    | 7992.17343    |
| 2442.85263    | 5572.60106    | 7012.56885    | 7996.94513    |
| 2455.26383    | 5574.29029    | 7026.08628    | 8020.58705    |
| 2654.74942    | 5606.86231    | 7030.12784    | 8021.19595    |
| 2695.10092    | 5607.75998    | 7051.86819    | 8038.26534    |
| 2736.47474    | 5627.12962    | 7062.82238    | 8042.36303    |
| 2757.41790    | 5634.66943    | 7067.22191    | 8045.84143    |
| 2762.47996    | 5653.92777    | 7071.69224    | 8045.90947    |
| 2821.00924    | 5660.05583    | 7094.07614    | 8051.62442    |
| 2855.71422    | 5695.38289    | 7094.64781    | 8068.05677    |
| 2992.70039    | 5718.52572    | 7108.65971    | 8076.90792    |
| 3012.31200    | 5741.94496    | 7115.98161    | 8081.06430    |

Supplementary data

|            |            |            |            |
|------------|------------|------------|------------|
| 3038.21422 | 5763.21501 | 7120.57778 | 8085.33323 |
| 3074.24288 | 5777.59477 | 7151.82463 | 8088.82615 |
| 3123.02343 | 5787.26870 | 7153.96749 | 8090.16493 |
| 3126.54774 | 5797.54565 | 7155.73380 | 8104.76020 |
| 3161.95991 | 5809.09382 | 7164.24135 | 8131.51741 |
| 3203.31851 | 5816.84402 | 7169.53918 | 8132.88853 |
| 3260.16382 | 5856.50910 | 7174.99570 | 8139.19316 |
| 3314.27233 | 5864.39456 | 7202.68196 | 8140.25360 |
| 3344.60076 | 5881.60781 | 7211.79986 | 8146.75191 |
| 3410.57329 | 5883.08892 | 7213.30702 | 8155.30352 |
| 3417.20821 | 5907.44409 | 7227.84710 | 8158.32559 |
| 3440.33327 | 5915.85513 | 7230.99241 | 8173.72398 |
| 3495.98918 | 5921.07873 | 7237.29493 | 8182.52690 |
| 3521.87865 | 5932.91863 | 7256.45895 | 8191.72270 |
| 3643.86739 | 5951.66819 | 7267.63598 | 8192.60490 |
| 3650.06343 | 5966.65360 | 7275.77034 | 8196.06467 |
| 3697.41176 | 5988.59256 | 7285.59071 | 8200.20526 |
| 3713.90939 | 6012.71230 | 7315.49021 | 8203.64010 |
| 3794.86913 | 6015.24895 | 7327.44681 | 8220.12456 |
| 3800.18446 | 6025.73285 | 7336.79596 | 8238.58595 |
| 3810.30508 | 6030.13684 | 7339.40138 | 8241.67459 |
| 3872.76969 | 6040.92892 | 7345.93077 | 8242.56627 |
| 3881.36804 | 6079.07147 | 7346.73068 | 8257.75173 |
| 3921.43172 | 6098.71722 | 7347.94594 | 8268.57724 |
| 3947.04738 | 6132.02545 | 7358.12953 | 8274.27690 |
| 3970.58873 | 6135.05974 | 7359.00116 | 8274.93395 |
| 3990.56959 | 6142.28920 | 7373.80104 | 8283.91122 |
| 4016.17333 | 6144.47049 | 7394.28334 | 8288.38217 |
| 4019.35218 | 6145.78287 | 7403.47939 | 8288.82925 |
| 4067.91879 | 6165.93808 | 7406.06821 | 8289.87025 |
| 4082.04427 | 6190.75800 | 7421.15504 | 8296.09501 |
| 4105.73811 | 6213.07903 | 7453.34896 | 8296.19214 |
| 4120.57153 | 6225.74516 | 7464.23615 | 8306.03883 |
| 4167.50059 | 6226.87079 | 7470.79044 | 8313.06197 |
| 4184.70278 | 6230.74213 | 7477.24457 | 8313.93158 |
| 4212.63887 | 6267.83927 | 7478.48708 | 8329.77760 |
| 4255.22782 | 6284.18274 | 7484.69299 | 8331.53812 |
| 4283.80528 | 6289.91978 | 7485.57619 | 8332.04604 |
| 4290.83253 | 6290.12685 | 7498.13180 | 8332.77491 |
| 4324.84126 | 6297.85052 | 7500.59870 | 8345.26812 |
| 4349.14149 | 6332.63436 | 7507.35845 | 8347.51971 |
| 4353.50971 | 6332.67743 | 7510.65239 | 8354.14961 |
| 4453.74047 | 6340.15316 | 7515.47745 | 8355.34186 |
| 4459.91406 | 6379.86680 | 7558.86584 | 8356.68235 |
| 4474.02063 | 6382.36655 | 7559.96550 | 8360.33026 |
| 4512.12615 | 6388.74340 | 7569.23896 | 8361.40520 |
| 4541.02955 | 6405.06731 | 7573.32196 | 8366.76619 |
| 4567.76057 | 6426.98845 | 7579.99462 | 8366.97635 |
| 4580.35413 | 6427.44604 | 7589.04438 | 8372.84093 |

Supplementary data

|            |            |            |            |
|------------|------------|------------|------------|
| 4623.69045 | 6445.98236 | 7593.62795 | 8375.68760 |
| 4632.80115 | 6467.45754 | 7601.36530 | 8377.96534 |
| 4637.86254 | 6472.03418 | 7632.17620 | 8384.01129 |
| 4657.71695 | 6482.58205 | 7634.87953 | 8384.63331 |
| 4714.10202 | 6489.65367 | 7644.02756 | 8388.42468 |
| 4733.27829 | 6500.29143 | 7646.61557 | 8390.13089 |
| 4750.66682 | 6515.90387 | 7649.82732 | 8392.45263 |
| 4781.67608 | 6539.09894 | 7675.09871 | 8400.77309 |
| 4798.06274 | 6540.13712 | 7678.47456 | 8403.97785 |
| 4834.56656 | 6542.03924 | 7686.10759 | 8406.55860 |
| 4839.16586 | 6566.53412 | 7691.07033 | 8411.03338 |
| 4843.34116 | 6572.16881 | 7694.68557 | 8411.44823 |
| 4852.91048 | 6582.60356 | 7698.54177 | 8419.08705 |
| 4913.60494 | 6593.52793 | 7706.37224 | 8420.94865 |
| 4917.32346 | 6613.56086 | 7720.85587 | 8423.53037 |
| 4923.07983 | 6624.39196 | 7728.36625 | 8424.10264 |
| 4933.61701 | 6628.12658 | 7741.44044 | 8425.29084 |
| 4977.90054 | 6634.01110 | 7749.26113 | 8425.93756 |
| 4980.73686 | 6643.84879 | 7750.23096 | 8428.25929 |
| 5005.60418 | 6663.84662 | 7755.31954 | 8437.10253 |
| 5024.46731 | 6694.25812 | 7776.65614 | 8439.79918 |
| 5028.43336 | 6730.83352 | 7781.49538 | 8441.37992 |
| 5090.74223 | 6738.47664 | 7785.25810 | 8443.83206 |
| 5121.14002 | 6740.78000 | 7789.96621 | 8443.87474 |
| 5127.76266 | 6745.44514 | 7816.55278 | 8447.56183 |
| 5140.15988 | 6752.30506 | 7831.70004 | 8448.58152 |
| 5143.98973 | 6767.15163 | 7832.40090 | 8451.53386 |
| 5185.12522 | 6769.55515 | 7845.40612 | 8451.76914 |

**Resonant A states**

| <i>Energy</i> | <i>Width</i> |
|---------------|--------------|
| 8467.47835    | 0.000456     |
| 8468.42629    | 0.000793     |
| 8471.93998    | 0.000234     |
| 8473.44404    | 0.000198     |
| 8475.04710    | 0.000190     |
| 8478.06443    | 0.001612     |
| 8479.13222    | 0.018497     |
| 8481.91254    | 0.027720     |
| 8482.73791    | 0.003206     |
| 8485.17370    | 0.000900     |
| 8486.85962    | 0.005581     |
| 8489.76889    | 0.021105     |
| 8490.35010    | 0.070373     |
| 8491.54107    | 0.132007     |
| 8492.07228    | 0.016103     |
| 8493.17605    | 0.002331     |
| 8493.93951    | 0.037295     |
| 8497.03900    | 0.052986     |
| 8497.69282    | 0.064438     |

Supplementary data

|            |          |
|------------|----------|
| 8500.61619 | 0.229075 |
| 8502.23402 | 0.209003 |
| 8502.55690 | 0.145353 |
| 8504.58270 | 0.132675 |
| 8505.03892 | 1.744144 |
| 8505.99363 | 1.083996 |
| 8505.99638 | 0.286592 |
| 8509.80628 | 0.577768 |
| 8511.25163 | 0.532148 |
| 8515.18267 | 0.216428 |
| 8515.76411 | 0.327919 |
| 8515.98730 | 1.356077 |
| 8516.45193 | 0.253850 |
| 8518.40886 | 3.182789 |
| 8518.99747 | 0.870216 |
| 8521.22541 | 2.124773 |
| 8522.22662 | 0.650844 |
| 8523.30867 | 1.755257 |
| 8524.11177 | 1.458643 |
| 8526.09831 | 0.829442 |
| 8527.56839 | 2.001107 |
| 8528.11473 | 2.199522 |
| 8530.37251 | 0.881446 |
| 8532.52907 | 2.777031 |
| 8533.15651 | 0.822757 |
| 8535.93719 | 2.130706 |
| 8536.22990 | 3.431121 |
| 8539.23518 | 1.917428 |
| 8540.58499 | 1.538340 |
| 8542.82518 | 2.061560 |
| 8545.88257 | 1.986959 |
| 8548.87503 | 3.288872 |
| 8550.10543 | 2.047023 |
| 8551.98747 | 2.586079 |
| 8557.16062 | 2.650119 |
| 8558.14276 | 3.067719 |
| 8570.26761 | 3.055805 |
| 8579.88399 | 3.019214 |
| 8581.23309 | 2.794017 |
| 8594.61885 | 3.777553 |
| 8595.58990 | 1.575304 |
| 8599.12421 | 1.589654 |
| 8604.02026 | 3.274300 |
| 8624.37690 | 1.708304 |
| 8625.92196 | 2.348709 |
| 8662.30187 | 2.575091 |
| 8666.06043 | 1.153984 |
| 8671.35059 | 1.601354 |
| 8671.82093 | 0.403627 |

Supplementary data

|            |          |
|------------|----------|
| 8673.02546 | 0.930929 |
| 8682.81265 | 3.672626 |
| 8688.44317 | 2.294264 |
| 8691.00948 | 0.775550 |
| 8701.43925 | 1.598574 |
| 8706.41772 | 0.785422 |
| 8718.84105 | 3.928412 |
| 8733.02541 | 1.527350 |
| 8734.23850 | 0.912018 |
| 8739.03464 | 2.876286 |
| 8751.90064 | 2.823397 |
| 8769.09972 | 3.283326 |
| 8792.51230 | 2.873665 |
| 8797.58614 | 0.118066 |
| 8804.50563 | 1.708944 |
| 8815.30871 | 0.161556 |
| 8817.11418 | 2.848933 |
| 8827.38597 | 2.613102 |
| 8838.18178 | 3.982467 |
| 8867.68667 | 3.349780 |
| 8886.20383 | 3.096298 |
| 8895.42076 | 0.334626 |
| 8904.21964 | 2.472557 |
| 8905.30524 | 3.068536 |
| 8927.04986 | 3.022009 |
| 8954.82033 | 1.582650 |
| 8964.09156 | 2.196595 |
| 8971.29434 | 1.669465 |
| 8985.86124 | 0.710752 |
| 8988.17688 | 2.916550 |
| 9003.88564 | 2.591090 |
| 9021.87379 | 0.046272 |
| 9100.68393 | 1.217616 |
| 9152.91170 | 0.247451 |
| 9236.78781 | 3.008582 |
| 9240.22206 | 2.251220 |
| 9303.31060 | 3.884798 |
| 9316.72945 | 2.890996 |
| 9340.23410 | 1.195212 |
| 9344.68949 | 3.014485 |
| 9385.37365 | 0.074074 |
| 9426.92087 | 0.687664 |
| 9448.13080 | 2.274063 |
| 9498.99908 | 3.545497 |
| 9518.59839 | 1.872189 |
| 9543.61897 | 2.908449 |
| 9545.84241 | 2.284941 |
| 9557.75531 | 1.789467 |
| 9572.81674 | 1.220024 |

Supplementary data

|            |          |
|------------|----------|
| 9592.48122 | 3.943575 |
| 9653.92687 | 0.361720 |
| 9667.14188 | 3.718393 |
| 9726.86935 | 3.886111 |
| 9743.33053 | 1.106926 |
| 9803.94065 | 2.418267 |
| 9813.23731 | 3.740549 |
| 9816.58746 | 2.943846 |
| 9818.47793 | 2.565634 |
| 9821.49031 | 3.874265 |
| 9873.37402 | 2.295377 |
| 9890.30889 | 3.939851 |
| 9902.31010 | 3.319357 |
| 9903.57358 | 3.268308 |
| 9905.82056 | 2.306429 |
| 9912.08837 | 3.842958 |
| 9918.54639 | 3.282917 |
| 9922.59149 | 2.715711 |
| 9926.48894 | 2.981270 |
| 9931.45549 | 0.474069 |
| 9941.44482 | 1.617467 |
| 9943.24873 | 1.979845 |
| 9953.73680 | 0.799410 |
| 9955.05915 | 0.049745 |
| 9958.20992 | 2.487335 |
| 9959.20808 | 1.074767 |
| 9961.81653 | 1.722129 |
| 9962.46152 | 0.995007 |
| 9975.43375 | 0.571571 |
| 9977.19027 | 3.753666 |
| 9980.78202 | 2.418639 |
| 9985.27443 | 3.608592 |
| 9985.73301 | 2.011859 |
| 9988.08670 | 2.300471 |
| 9992.07448 | 3.411712 |
| 9994.10026 | 3.202364 |
| 9994.19847 | 0.454262 |

**Bound B states**

| <i>Energy</i> | <i>Energy</i> | <i>Energy</i> | <i>Energy</i> |
|---------------|---------------|---------------|---------------|
| 14.22259      | 5353.96147    | 6877.41951    | 7892.58348    |
| 698.55935     | 5354.82700    | 6880.55470    | 7894.99661    |
| 1007.95478    | 5379.21647    | 6896.59474    | 7906.34709    |
| 1041.85185    | 5380.53057    | 6904.38584    | 7906.77854    |
| 1104.57564    | 5416.39386    | 6919.56957    | 7910.10161    |
| 1380.40060    | 5426.86819    | 6925.51407    | 7928.05575    |
| 1685.77959    | 5443.28785    | 6929.18484    | 7949.32867    |
| 1710.31811    | 5482.63188    | 6937.45567    | 7956.90181    |
| 1781.22717    | 5495.64519    | 6958.50415    | 7959.85139    |

Supplementary data

|            |            |            |            |
|------------|------------|------------|------------|
| 2042.11315 | 5521.73039 | 6986.39422 | 7974.81616 |
| 2049.14204 | 5527.18141 | 6993.08855 | 7983.16036 |
| 2059.72712 | 5540.13706 | 7003.90782 | 7988.06809 |
| 2104.26757 | 5543.54138 | 7012.56537 | 7992.16258 |
| 2186.62027 | 5606.86223 | 7026.34048 | 7995.02087 |
| 2360.73184 | 5622.13685 | 7030.12502 | 7996.93162 |
| 2375.79621 | 5627.12958 | 7039.19011 | 8020.57862 |
| 2455.26381 | 5634.66907 | 7062.82210 | 8038.26189 |
| 2695.10089 | 5653.92773 | 7067.22170 | 8045.82625 |
| 2717.59474 | 5688.02319 | 7071.69116 | 8045.90846 |
| 2736.47472 | 5690.67032 | 7094.64436 | 8051.61325 |
| 2762.47994 | 5695.38269 | 7108.65584 | 8057.24728 |
| 2855.71420 | 5718.52563 | 7120.57643 | 8063.79060 |
| 2951.19704 | 5741.94480 | 7130.51809 | 8076.89217 |
| 3012.31198 | 5777.59474 | 7149.28316 | 8081.04188 |
| 3032.72594 | 5787.26845 | 7153.96619 | 8082.00124 |
| 3038.21420 | 5795.11169 | 7155.73163 | 8085.33051 |
| 3074.24286 | 5795.58513 | 7159.76801 | 8088.82348 |
| 3095.10474 | 5797.54553 | 7169.53889 | 8104.75134 |
| 3126.54771 | 5864.39442 | 7174.99448 | 8131.51213 |
| 3161.95989 | 5881.60770 | 7193.21196 | 8134.82714 |
| 3260.16380 | 5883.08879 | 7213.30463 | 8139.18569 |
| 3344.60073 | 5890.96336 | 7227.84654 | 8142.18735 |
| 3382.45119 | 5907.44400 | 7230.98874 | 8155.29800 |
| 3410.57326 | 5932.91784 | 7251.82603 | 8158.30151 |
| 3417.20818 | 5966.65331 | 7256.45413 | 8162.13449 |
| 3521.87863 | 5984.22237 | 7275.76895 | 8173.70836 |
| 3598.94437 | 5988.59249 | 7279.20729 | 8191.72104 |
| 3650.06340 | 5994.16556 | 7285.58916 | 8192.59158 |
| 3697.41174 | 6015.24858 | 7300.88141 | 8195.69446 |
| 3701.64718 | 6025.73279 | 7313.90367 | 8203.62145 |
| 3713.90937 | 6040.92863 | 7315.48979 | 8206.73156 |
| 3753.32552 | 6062.40429 | 7336.79065 | 8220.11166 |
| 3794.86910 | 6079.07144 | 7339.39752 | 8237.85725 |
| 3810.30505 | 6098.71704 | 7345.92899 | 8238.57181 |
| 3904.42642 | 6132.02516 | 7347.94483 | 8242.55082 |
| 3921.43170 | 6135.05963 | 7358.99869 | 8257.73977 |
| 3947.04735 | 6145.78255 | 7394.28327 | 8266.88174 |
| 3990.56957 | 6150.25931 | 7398.37649 | 8274.24848 |
| 4016.17330 | 6155.95396 | 7403.46571 | 8274.82060 |
| 4043.30538 | 6165.93790 | 7406.06723 | 8283.89747 |
| 4067.91876 | 6181.21236 | 7408.45186 | 8284.92776 |
| 4082.04424 | 6226.17061 | 7421.15109 | 8288.37505 |
| 4105.73809 | 6226.87010 | 7427.58975 | 8289.86250 |
| 4131.07391 | 6230.74195 | 7464.23599 | 8296.09272 |
| 4184.70276 | 6267.83906 | 7470.57945 | 8306.00864 |
| 4212.63885 | 6284.18231 | 7470.78528 | 8307.36676 |
| 4243.27318 | 6290.12673 | 7477.24349 | 8313.95081 |
| 4283.80525 | 6297.85045 | 7484.69014 | 8329.77391 |

Supplementary data

|            |            |            |            |
|------------|------------|------------|------------|
| 4324.84124 | 6313.86132 | 7500.58937 | 8331.53564 |
| 4349.14146 | 6332.63418 | 7502.86790 | 8332.07290 |
| 4353.50969 | 6340.15253 | 7507.35628 | 8332.18238 |
| 4367.34832 | 6342.98211 | 7514.35064 | 8342.93969 |
| 4406.58540 | 6382.36604 | 7515.47482 | 8347.47826 |
| 4453.74044 | 6398.41983 | 7545.86495 | 8354.11895 |
| 4459.91404 | 6405.06694 | 7559.95939 | 8354.99162 |
| 4538.53687 | 6419.06047 | 7569.23875 | 8356.69522 |
| 4567.76054 | 6422.56169 | 7579.99277 | 8361.41404 |
| 4580.35410 | 6426.98841 | 7589.02918 | 8366.79203 |
| 4632.80112 | 6427.44598 | 7601.36005 | 8366.85003 |
| 4637.86250 | 6472.03370 | 7604.56882 | 8368.13785 |
| 4699.55448 | 6482.58067 | 7632.16332 | 8377.26623 |
| 4714.10200 | 6500.29076 | 7636.74633 | 8381.71394 |
| 4733.27825 | 6513.22956 | 7638.14406 | 8384.64531 |
| 4750.66679 | 6515.90343 | 7644.01389 | 8388.01295 |
| 4765.24957 | 6539.09687 | 7649.82512 | 8389.69560 |
| 4784.81695 | 6540.13692 | 7674.90353 | 8390.95681 |
| 4839.16582 | 6572.16840 | 7678.46976 | 8401.52432 |
| 4843.34113 | 6578.41465 | 7686.10271 | 8404.14679 |
| 4852.91045 | 6582.60236 | 7691.06939 | 8406.37460 |
| 4884.19268 | 6613.56071 | 7694.68250 | 8408.06533 |
| 4913.60490 | 6628.12543 | 7706.35311 | 8411.90848 |
| 4923.07977 | 6629.07908 | 7716.79655 | 8419.13496 |
| 4925.60194 | 6634.01020 | 7728.35517 | 8420.30531 |
| 4977.90052 | 6663.84628 | 7749.25546 | 8420.95431 |
| 4980.73682 | 6682.49739 | 7755.30786 | 8423.54282 |
| 5005.60415 | 6688.01434 | 7755.36174 | 8425.27421 |
| 5028.43327 | 6694.25764 | 7776.64918 | 8425.41359 |
| 5029.63650 | 6738.47661 | 7781.49122 | 8428.28386 |
| 5053.24300 | 6740.77888 | 7783.71893 | 8437.11963 |
| 5090.74219 | 6741.36482 | 7789.96526 | 8439.72164 |
| 5121.13999 | 6745.44310 | 7816.54736 | 8441.25452 |
| 5127.76262 | 6752.30484 | 7829.79103 | 8442.13613 |
| 5160.55921 | 6786.07167 | 7832.40010 | 8447.31044 |
| 5168.55667 | 6791.80319 | 7844.91201 | 8447.86296 |
| 5185.12515 | 6799.51619 | 7845.40147 | 8448.93006 |
| 5233.13847 | 6801.86460 | 7851.31461 | 8450.97793 |
| 5254.56981 | 6810.68591 | 7855.66761 | 8451.22147 |
| 5256.15985 | 6830.89510 | 7855.77248 |            |
| 5271.94697 | 6854.91652 | 7867.74324 |            |
| 5350.29232 | 6860.71835 | 7869.26344 |            |

**Resonant B states**

| <i>Energy</i> | <i>Width</i> |
|---------------|--------------|
| 8454.79023    | 0.00015      |
| 8459.37725    | 0.00000      |
| 8462.50061    | 0.00000      |
| 8464.96998    | 0.00000      |
| 8466.94451    | 0.00045      |



Supplementary data

|            |         |
|------------|---------|
| 8468.57495 | 0.00067 |
| 8469.30074 | 0.00000 |
| 8470.72490 | 0.00017 |
| 8472.94601 | 0.00017 |
| 8474.39141 | 0.00018 |
| 8477.39811 | 0.00045 |
| 8478.24502 | 0.00366 |
| 8478.60837 | 0.00399 |
| 8479.64441 | 0.01547 |
| 8482.36217 | 0.02942 |
| 8483.05189 | 0.00310 |
| 8488.82484 | 0.00094 |
| 8490.64245 | 0.10743 |
| 8491.51130 | 0.12425 |
| 8492.42784 | 0.01606 |
| 8493.99314 | 0.01940 |
| 8494.38848 | 0.01682 |
| 8497.42884 | 0.08144 |
| 8498.11329 | 0.02265 |
| 8500.99507 | 0.17024 |
| 8501.53434 | 0.34608 |
| 8502.96235 | 0.11010 |
| 8504.29386 | 0.18264 |
| 8505.06421 | 1.70323 |
| 8506.05401 | 1.22567 |
| 8508.63294 | 0.38064 |
| 8509.59983 | 0.04026 |
| 8510.00031 | 0.52008 |
| 8513.76211 | 0.20902 |
| 8514.43139 | 0.78753 |
| 8516.44231 | 0.81350 |
| 8518.40954 | 3.43703 |
| 8520.21976 | 1.42221 |
| 8521.12413 | 1.86278 |
| 8522.34589 | 1.69153 |
| 8523.11718 | 1.86977 |
| 8524.70803 | 0.48394 |
| 8524.94403 | 1.48732 |
| 8527.69043 | 0.67212 |
| 8529.07051 | 1.52191 |
| 8530.37177 | 0.66096 |
| 8536.09121 | 3.97227 |
| 8539.68724 | 3.55601 |
| 8542.28503 | 1.31661 |
| 8542.43252 | 2.28976 |
| 8545.44390 | 0.42159 |
| 8546.80455 | 2.63137 |
| 8547.30503 | 1.60420 |
| 8550.11975 | 0.92618 |

## Supplementary data

|            |         |
|------------|---------|
| 8550.84256 | 1.36055 |
| 8552.26872 | 2.25721 |
| 8556.89628 | 3.06274 |
| 8557.43194 | 2.11642 |
| 8558.55559 | 1.82091 |
| 8564.23775 | 2.11721 |
| 8575.97789 | 1.49002 |
| 8580.39045 | 2.68581 |
| 8595.60053 | 1.52150 |
| 8597.51585 | 3.90635 |
| 8599.13336 | 1.72561 |
| 8636.20825 | 2.43577 |
| 8662.19523 | 3.02619 |
| 8671.31596 | 1.30767 |
| 8673.12555 | 1.51584 |
| 8682.65745 | 3.14474 |
| 8688.09354 | 2.93089 |
| 8690.95990 | 0.61126 |
| 8693.00511 | 1.51804 |
| 8701.70954 | 1.98451 |
| 8706.28075 | 0.78211 |
| 8713.18486 | 3.46343 |
| 8719.60580 | 1.86149 |
| 8733.24546 | 1.68829 |
| 8738.95370 | 2.80962 |
| 8759.54952 | 1.80915 |
| 8769.14993 | 3.22616 |
| 8792.55300 | 3.00897 |
| 8815.24739 | 0.16621 |
| 8816.51024 | 0.40123 |
| 8817.09382 | 2.73125 |
| 8838.19490 | 3.85978 |
| 8840.48602 | 0.37173 |
| 8853.85198 | 2.35138 |
| 8867.69580 | 3.31177 |
| 8875.91938 | 2.27524 |
| 8886.16617 | 3.11055 |
| 8895.27076 | 0.35005 |
| 8905.21340 | 3.06744 |
| 8954.72463 | 1.57539 |
| 8960.71728 | 3.76339 |
| 8985.79221 | 0.72192 |
| 8988.09725 | 2.91133 |
| 9032.91401 | 2.16828 |
| 9072.46015 | 2.37729 |
| 9100.62411 | 1.20547 |
| 9152.84884 | 0.24624 |
| 9190.44507 | 0.24497 |
| 9236.68392 | 3.00815 |

Supplementary data

|            |         |
|------------|---------|
| 9303.20847 | 3.92311 |
| 9340.21458 | 1.18739 |
| 9426.55343 | 0.75442 |
| 9461.57493 | 2.37423 |
| 9475.28090 | 0.42541 |
| 9518.45250 | 1.71559 |
| 9524.83015 | 3.43315 |
| 9543.22973 | 2.94033 |
| 9557.48245 | 1.80951 |
| 9572.58155 | 1.22479 |
| 9653.48156 | 0.36084 |
| 9726.86964 | 3.88802 |
| 9742.95705 | 1.08202 |
| 9763.42586 | 3.76760 |
| 9803.63247 | 2.47571 |
| 9812.54550 | 3.81641 |
| 9813.23782 | 3.74215 |
| 9815.11188 | 0.79661 |
| 9816.39194 | 2.90165 |
| 9820.50990 | 0.22621 |
| 9890.21442 | 3.91125 |
| 9902.31011 | 3.31984 |
| 9904.80516 | 1.96541 |
| 9911.97504 | 3.94058 |
| 9919.47577 | 3.28817 |
| 9922.87188 | 2.52031 |
| 9941.33567 | 1.32424 |
| 9951.53833 | 3.98514 |
| 9955.09993 | 0.14051 |
| 9957.70477 | 3.59468 |
| 9958.13330 | 2.59967 |
| 9961.72038 | 1.56027 |
| 9962.45545 | 0.94666 |
| 9975.31282 | 1.03904 |
| 9978.05633 | 2.48511 |
| 9979.44091 | 2.28337 |
| 9984.73572 | 2.24608 |
| 9987.57324 | 2.06906 |
| 9988.80529 | 1.83708 |
| 9992.10598 | 2.60429 |
| 9994.10037 | 3.20211 |
| 9994.28809 | 0.48477 |
| 9997.47926 | 3.05390 |
